# Supplementary material for: Pumilio-2 Function in the Mouse Nervous System
Source: PubMed Central journal article supplement (PMC3189250; doi:10.1371/journal.pone.0025932), 2011-10-07
Supplement: pone.0025932.s001.pdf [file pone.0025932.s001.pdf]

| Category                         | Symbol  | RefSeq         | Taqman assay ID | Alias     | Gene name                                                            |
|----------------------------------|---------|----------------|-----------------|-----------|----------------------------------------------------------------------|
| Neuronal                         | Ache    | NM_009599.3    | Mm00477275_m1   |           | Acetylcholinesterase                                                 |
|                                  | App     | NM_007471.2    | Mm00431827_m1   |           | amyloid beta (A4) precursor protein                                  |
|                                  | Dlg1    | NM_007862.2    | Mm00492189_m1   | Sap97     | discs, large homolog 1                                               |
|                                  | Dlg2    | NM_011807.2    | Mm00457160_m1   | PSD93     | discs, large homolog 2                                               |
|                                  | Dlg3    | NM_016747.2    | Mm00497394_m1   | SAP102    | discs, large homolog 3                                               |
|                                  | Dlg4    | NM_001109752.1 | Mm00492193_m1   | PSD95     | discs, large homolog 4                                               |
|                                  | Kcnq1   | NM_008434.2    | Mm00434638_m1   | Kcna9     | potassium voltage-gated channel, subfamily Q, member 1               |
|                                  | Kcnq2   | NM_001003825.2 | Mm00440084_mH   |           | potassium voltage-gated channel, subfamily Q, member 2               |
|                                  | Kcnq3   | NM_152923.1    | Mm00548884_m1   |           | potassium voltage-gated channel, subfamily Q, member 3               |
|                                  | Merg1a  | NM_013569.2    | Mm00465370_m1   | Kcnh2     | potassium voltage-gated channel, subfamily H (eag-related), member 2 |
|                                  | Nav1.1  | NM_018733.2    | Mm01329044_mH   | Scn1a     | sodium channel, voltage-gated, type I, alpha                         |
|                                  | Nav1.2  | NM_001099298.2 | Mm01270369_m1   | Scn2a1    | sodium channel, voltage-gated, type II, alpha 1                      |
|                                  | Nav1.5  | NM_021544.3    | Mm00451973_mH   | Scn5a     | sodium channel, voltage-gated, type V, alpha                         |
|                                  | Nav1.6  | NM_001077499.1 | Mm01300412_mH   | Scn8a     | sodium channel, voltage-gated, type VIII, alpha                      |
|                                  | Ncam1   | NM_010875.3    | Mm00456815_m1   |           | Neural cell adhesion molecule                                        |
|                                  | Nse     | NM_013509.2    | Mm00469062_m1   | Eno2      | enolase 2, gamma neuronal                                            |
|                                  | Syn     | NM_009305.2    | Mm00436850_m1   | Syp       | synaptophysin                                                        |
|                                  | Tubb3   | NM_023279.2    | Mm00727586_s1   |           | tubulin, beta 3                                                      |
|                                  | Zic3    | NM_009575.2    | Mm00494362_m1   | Bn        | zinc finger protein of the cerebellum 3                              |
| RNA and Translational Regulation | Ago2    | NM_153178.3    | Mm00838341_m1   | Eif2c2    | eukaryotic translation initiation factor 2C, 2                       |
|                                  | Ago3    | NM_153402.2    | Mm01188534_m1   | Eif2c3    | eukaryotic translation initiation factor 2C, 3                       |
|                                  | Cpsf2   | NM_016856.3    | Mm00489745_m1   |           | cleavage and polyadenylation specific factor 2                       |
|                                  | Ddx20   | NM_017397.3    | Mm00600300_g1   | Gemin3    | DEAD (Asp-Glu-Ala-Asp) box polypeptide 20                            |
|                                  | Dicer   | NM_148948.2    | Mm00521731_m1   |           | Dicer1, Dcr-1 homolog (Drosophila)                                   |
|                                  | Eif1a   | NM_010120.5    | Mm00456651_m1   |           | eukaryotic translation initiation factor 1A                          |
|                                  | Eif3b   | NM_133916.2    | Mm00659801_m1   |           | eukaryotic translation initiation factor 3, subunit B                |
|                                  | Eif3c   | NM_146200.1    | Mm01278697_m1   | NipilA3   | eukaryotic translation initiation factor 3, subunit C                |
|                                  | Eif3e   | NM_008388.2    | Mm01700222_g1   |           | eukaryotic translation initiation factor 3, subunit E                |
|                                  | Eif4e   | NM_007917.3    | Mm00725633_s1   |           | eukaryotic translation initiation factor 4E                          |
|                                  | Eif5b   | NM_198303.2    | Mm01227234_m1   |           | eukaryotic translation initiation factor 5B                          |
|                                  | Fmr1    | NM_008031.2    | Mm00484415_m1   | Fmrp      | fragile X mental retardation syndrome 1 homolog                      |
|                                  | Fxr2    | NM_011814.2    | Mm00839957_m1   |           | fragile X mental retardation, autosomal homolog 2                    |
|                                  | Gemin5  | NM_172558.2    | Mm00553372_m1   |           | gem (nuclear organelle) associated protein 5                         |
|                                  | Nanos1  | NM_178421.3    | Mm02525647_s1   | Nos1      | nanos homolog 1 (Drosophila)                                         |
|                                  | Nanos2  | NM_194064.2    | Mm02525720_s1   | Nos2      | nanos homolog 2 (Drosophila)                                         |
|                                  | Paip1   | NM_145457.3    | Mm00520884_m1   |           | polyadenylate binding protein-interacting protein 1                  |
|                                  | Papola  | NM_011112.3    | Mm01334253_m1   | Pap; Plap | poly (A) polymerase alpha                                            |
|                                  | Piwil2  | NM_021308.1    | Mm00502383_m1   | Mili      | piwi-like homolog 2                                                  |
|                                  | Prpf4b  | NM_013830.2    | Mm00443401_m1   | Prp4k     | PRP4 pre-mRNA processing factor 4 homolog B                          |
|                                  | Pum1    | NM_030722.2    | Mm00472886_m1   |           | pumilio 1 (Drosophila)                                               |
|                                  | Pum2    | NM_030723.2    | Mm00472902_m1   |           | pumilio 2 (Drosophila)                                               |
|                                  | Pum2-2  | NM_030723.2    | Mm01270654_m1   |           | pumilio 2 (Drosophila)                                               |
|                                  | Sip1    | NM_025656.4    | Mm00491823_m1   | Gemin2    | survival of motor neuron protein interacting protein 1               |
|                                  | Syncrip | NM_019796.4    | Mm00479927_m1   | Nsap1     | synaptotagmin binding, cytoplasmic RNA interacting protein           |

| Category                           | Symbol         | RefSeq         | Taqman assay ID | Alias                                              | Gene name                                                                                         |
|------------------------------------|----------------|----------------|-----------------|----------------------------------------------------|---------------------------------------------------------------------------------------------------|
| DNA and Transcriptional Regulation | Brg1           | NM_011417.2    | Mm01151944_m1   | Smarca4                                            | SWI/SNF related, matrix associated, actin dependent regulator of chromatin, subfamily a, member 4 |
|                                    | Dnmt1          | NM_010066.3    | Mm00599763_m1   |                                                    | DNA methyltransferase (cytosine-5) 1                                                              |
|                                    | Dnmt3a         | NM_007872.4    | Mm00432870_m1   |                                                    | DNA methyltransferase 3A                                                                          |
|                                    | Dnmt3b         | NM_001003960.3 | Mm01240113_m1   |                                                    | DNA methyltransferase 3B                                                                          |
|                                    | Gtf2f1         | NM_133801.2    | Mm00505439_m1   | TfIIAa/b                                           | general transcription factor II A, 1                                                              |
|                                    | Hdac2          | NM_008229.2    | Mm00515108_m1   |                                                    | histone deacetylase 2                                                                             |
|                                    | Hsf1           | NM_008296.2    | Mm01201402_m1   |                                                    | heat shock factor 1                                                                               |
|                                    | Hsp70.1        | NM_010478.2    | Mm03038954_s1   | Hspa1b                                             | heat shock protein 1B                                                                             |
|                                    | Hspbab1        | NM_175111.3    | Mm00613037_m1   |                                                    | Hspb (heat shock 27kDa) associated protein 1                                                      |
|                                    | Id3            | NM_008321.2    | Mm00492575_m1   |                                                    | inhibitor of DNA binding 3                                                                        |
|                                    | Nfat5          | NM_133957.3    | Mm00467257_m1   | TonEBP                                             | nuclear factor of activated T-cells 5                                                             |
|                                    | Pax6           | NM_013627.4    | Mm00443072_m1   |                                                    | paired box gene 6                                                                                 |
|                                    | Sin3b          | NM_009188.3    | Mm01247119_m1   |                                                    | transcriptional regulator, SIN3B                                                                  |
| Sox9                               | NM_011448.4    | Mm00448840_m1  |                 | SRY-box containing gene 9                          |                                                                                                   |
| Stat3                              | NM_213659.2    | Mm01219775_m1  | Aprf            | signal transducer and activator of transcription 3 |                                                                                                   |
| Cell Cycle                         | Ccnb1          | NM_172301.3    | Mm03053893_gH   |                                                    | Cyclin B1                                                                                         |
|                                    | Ccne           | NM_007633.2    | Mm01266311_m1   |                                                    | Cyclin E1                                                                                         |
|                                    | Cdc25a         | NM_007658.3    | Mm00483166_m1   |                                                    | cell division cycle 25 homolog A                                                                  |
|                                    | Cdc2a          | NM_007659.3    | Mm00772471_m1   | Cdk1                                               | cell division cycle 2 homolog A                                                                   |
|                                    | Cdkn1b         | NM_009875.4    | Mm00438168_m1   | p27Kip1                                            | cyclin-dependent kinase inhibitor 1B                                                              |
|                                    | Pard3          | NM_033620.2    | Mm00473929_m1   | Par3                                               | partitioning defective 3 homolog                                                                  |
|                                    | Pard6a         | NM_001047435.1 | Mm00480004_m1   | Par6                                               | partitioning defective 6, homolog alpha                                                           |
| Apoptosis                          | Bax            | NM_007527.3    | Mm00432050_m1   |                                                    | Bcl2-associated X protein                                                                         |
|                                    | Bcl2           | NM_009741.3    | Mm00477631_m1   |                                                    | B-cell leukemia/lymphoma 2                                                                        |
|                                    | Becn1          | NM_019584.3    | Mm00517174_m1   |                                                    | beclin 1, autophagy related                                                                       |
| Other                              | Bmpr1a         | NM_009758.4    | Mm00477650_m1   |                                                    | bone morphogenetic protein receptor, type 1A                                                      |
|                                    | Gnb2l1         | NM_008143.3    | Mm00515010_m1   | Rack1                                              | guanine nucleotide binding protein (G protein), beta polypeptide 2 like 1                         |
|                                    | Ifitm3         | NM_025378.2    | Mm00847057_s1   | Fragilis                                           | interferon induced transmembrane protein 3                                                        |
|                                    | Kdr            | NM_010612.2    | Mm00440111_m1   | VEGFR2, Flk1                                       | kinase insert domain protein receptor                                                             |
|                                    | Kitl           | NM_013598.2    | Mm00442972_m1   | SCF, SF                                            | Kit ligand                                                                                        |
|                                    | MapK1          | NM_001038663.1 | Mm00442479_m1   | Erk2                                               | mitogen-activated protein kinase 1                                                                |
|                                    | Mapk1-l        | NM_011949.3    | Mm00466437_s1   | Erk2                                               | mitogen-activated protein kinase 1                                                                |
|                                    | MapK14         | NM_011951.2    | Mm00442497_m1   | p38alpha                                           | mitogen-activated protein kinase 14                                                               |
|                                    | Rbbp6          | NM_011247.2    | Mm00656624_m1   | P2P-R                                              | retinoblastoma binding protein 6                                                                  |
|                                    | Sparc          | NM_009242.4    | Mm00486332_m1   | BM-40                                              | secreted acidic cysteine rich glycoprotein                                                        |
| Vegfa                              | NM_001025250.3 | Mm00437306_m1  |                 | vascular endothelial growth factor A               |                                                                                                   |
| House-keeping                      | Ctnnb1         | NM_007614.2    | Mm01350394_m1   | Catnb                                              | catenin (cadherin associated protein), beta 1                                                     |
|                                    | Gapdh          | NM_008084.2    | Mm99999915_g1   |                                                    | glyceraldehyde-3-phosphate dehydrogenase                                                          |
|                                    | Ubc            | BC008661.1     | Mm01201237_m1   |                                                    | ubiquitin C                                                                                       |
